# Supplementary material
Source: publisher figshare collection journal article supplement (https://acs.figshare.com/ndownloader/files/5031163)
Supplement: Supplementary file 1 [file 5031163]

 
data_C20H21NO5S 
 
_audit_creation_method            SHELXL-97 
_chemical_name_systematic 
; 
 ? 
; 
_chemical_name_common             ? 
_chemical_melting_point           ? 
_chemical_formula_moiety          ? 
_chemical_formula_sum 
 'C20 H21 N O5 S' 
_chemical_formula_weight          387.44 
 
loop_ 
 _atom_type_symbol 
 _atom_type_description 
 _atom_type_scat_dispersion_real 
 _atom_type_scat_dispersion_imag 
 _atom_type_scat_source 
 'C'  'C'   0.0033   0.0016 
 'International Tables Vol C Tables 4.2.6.8 and 6.1.1.4' 
 'H'  'H'   0.0000   0.0000 
 'International Tables Vol C Tables 4.2.6.8 and 6.1.1.4' 
 'N'  'N'   0.0061   0.0033 
 'International Tables Vol C Tables 4.2.6.8 and 6.1.1.4' 
 'O'  'O'   0.0106   0.0060 
 'International Tables Vol C Tables 4.2.6.8 and 6.1.1.4' 
 'S'  'S'   0.1246   0.1234 
 'International Tables Vol C Tables 4.2.6.8 and 6.1.1.4' 
 
_symmetry_cell_setting            monoclinic 
_symmetry_space_group_name_H-M    'P 21/n'
_symmetry_space_group_name_Hall   '-P 2yn'
 
loop_ 
 _symmetry_equiv_pos_as_xyz 
 'x, y, z' 
 '-x+1/2, y+1/2, -z+1/2' 
 '-x, -y, -z' 
 'x-1/2, -y-1/2, z-1/2' 
 
_cell_length_a                    7.7950(5) 
_cell_length_b                    21.5130(13) 
_cell_length_c                    11.4883(7) 
_cell_angle_alpha                 90.00 
_cell_angle_beta                  95.420(2) 
_cell_angle_gamma                 90.00 
_cell_volume                      1917.9(2) 
_cell_formula_units_Z             4 
_cell_measurement_temperature     296(2) 
_cell_measurement_reflns_used     323
_cell_measurement_theta_min       3.3 
_cell_measurement_theta_max       24.2 
 
_exptl_crystal_description        'parallelepiped' 
_exptl_crystal_colour             'colorless' 
_exptl_crystal_size_max           0.345  
_exptl_crystal_size_mid           0.192 
_exptl_crystal_size_min           0.137 
_exptl_crystal_density_meas       'not measured'  
_exptl_crystal_density_diffrn     1.342 
_exptl_crystal_density_method     'not measured' 
_exptl_crystal_F_000              816 
_exptl_absorpt_coefficient_mu     0.200 
_exptl_absorpt_correction_type    'multi-scan' 
_exptl_absorpt_correction_T_min   0.632 
_exptl_absorpt_correction_T_max    0.746
_exptl_absorpt_process_details    '(SHELX76; Sheldrick, 2008)'
_diffrn_standards_decay_%     0
_diffrn_standards_number     0
_diffrn_standards_interval_count 0  
_exptl_special_details
; 
 ? 
; 
 
_diffrn_ambient_temperature       296(2) 
_diffrn_radiation_wavelength      0.71073 
_diffrn_radiation_type            MoK\a 
_diffrn_radiation_source          'fine-focus sealed tube' 
_diffrn_radiation_monochromator   graphite 
_diffrn_measurement_device_type   'Bruker APEXII' 
_diffrn_measurement_method        '\w scans' 
_diffrn_detector_area_resol_mean  ? 
_diffrn_reflns_number             42466 
_diffrn_reflns_av_R_equivalents   0.0614 
_diffrn_reflns_av_sigmaI/netI     0.0313 
_diffrn_reflns_limit_h_min        -9 
_diffrn_reflns_limit_h_max        9 
_diffrn_reflns_limit_k_min        -25 
_diffrn_reflns_limit_k_max        25 
_diffrn_reflns_limit_l_min        -13 
_diffrn_reflns_limit_l_max        13 
_diffrn_reflns_theta_min          2.60 
_diffrn_reflns_theta_max          25.35 
_reflns_number_total              3516 
_reflns_number_gt                 2420 
_reflns_threshold_expression      >2sigma(I) 
 
_computing_data_collection        'APEX2 (Bruker, 2007)'
_computing_cell_refinement        'SAINT-Plus (Bruker, 2007)' 
_computing_data_reduction         'SAINT-Plus (Bruker, 2007)' 
_computing_structure_solution     'SHELXS-97 (Sheldrick, 2008)' 
_computing_structure_refinement   'SHELXL-97 (Sheldrick, 2008)'  
_computing_molecular_graphics     ? 
_computing_publication_material   ?  
_chemical_absolute_configuration 'rm' 
 
_refine_special_details 
; 
 Refinement of F^2^ against ALL reflections.  The weighted R-factor wR and 
 goodness of fit S are based on F^2^, conventional R-factors R are based 
 on F, with F set to zero for negative F^2^. The threshold expression of 
 F^2^ > 2sigma(F^2^) is used only for calculating R-factors(gt) etc. and is 
 not relevant to the choice of reflections for refinement.  R-factors based 
 on F^2^ are statistically about twice as large as those based on F, and R- 
 factors based on ALL data will be even larger. 
; 
 
_refine_ls_structure_factor_coef  Fsqd  
_refine_ls_matrix_type            full 
_refine_ls_weighting_scheme       calc  
_refine_ls_weighting_details 
 'calc w=1/[\s^2^(Fo^2^)+(0.1356P)^2^+2.8401P] where P=(Fo^2^+2Fc^2^)/3' 
_atom_sites_solution_primary      direct 
_atom_sites_solution_secondary    difmap 
_atom_sites_solution_hydrogens    geom 
_refine_ls_hydrogen_treatment     constr 
_refine_ls_extinction_method      none 
_refine_ls_extinction_coef        ? 
_refine_ls_number_reflns          3516 
_refine_ls_number_parameters      246 
_refine_ls_number_restraints      0 
_refine_ls_R_factor_all           0.1213 
_refine_ls_R_factor_gt            0.0833 
_refine_ls_wR_factor_ref          0.2805 
_refine_ls_wR_factor_gt           0.2412 
_refine_ls_goodness_of_fit_ref    1.100 
_refine_ls_restrained_S_all       1.100 
_refine_ls_shift/su_max           0.000 
_refine_ls_shift/su_mean          0.000 
 
loop_ 
 _atom_site_label 
 _atom_site_type_symbol 
 _atom_site_fract_x 
 _atom_site_fract_y 
 _atom_site_fract_z 
 _atom_site_U_iso_or_equiv 
 _atom_site_adp_type 
 _atom_site_occupancy 
 _atom_site_symmetry_multiplicity 
 _atom_site_calc_flag 
 _atom_site_refinement_flags 
 _atom_site_disorder_assembly 
 _atom_site_disorder_group 
C1 C 0.1256(6) 0.7295(2) 0.8219(5) 0.0591(13) Uani 1 1 d . . . 
H1 H 0.1929 0.7619 0.8547 0.071 Uiso 1 1 calc R . . 
C2 C 0.1597(9) 0.6680(3) 0.8504(6) 0.0874(18) Uani 1 1 d . . . 
H2 H 0.2541 0.6587 0.9032 0.105 Uiso 1 1 calc R . . 
C3 C 0.0630(12) 0.6222(3) 0.8053(8) 0.102(2) Uani 1 1 d . . . 
H3 H 0.0921 0.5818 0.8281 0.122 Uiso 1 1 calc R . . 
C4 C -0.0730(12) 0.6306(3) 0.7295(8) 0.104(2) Uani 1 1 d . . . 
H4 H -0.1364 0.5963 0.7009 0.125 Uiso 1 1 calc R . . 
C5 C -0.1203(7) 0.6866(2) 0.6938(5) 0.0614(13) Uani 1 1 d . . . 
H5 H -0.2168 0.6917 0.6406 0.074 Uiso 1 1 calc R . . 
C6 C -0.0226(6) 0.7404(2) 0.7371(4) 0.0540(12) Uani 1 1 d . . . 
C7 C -0.0770(5) 0.8033(2) 0.6984(4) 0.0504(11) Uani 1 1 d . . . 
O1 O -0.2118(5) 0.81443(18) 0.6417(4) 0.0872(13) Uani 1 1 d . . . 
O2 O 0.0352(3) 0.84747(12) 0.7336(3) 0.0475(8) Uani 1 1 d . . . 
C8 C -0.0146(5) 0.91052(19) 0.6983(4) 0.0510(11) Uani 1 1 d . . . 
H8A H -0.1335 0.9179 0.7128 0.061 Uiso 1 1 calc R . . 
H8B H -0.0051 0.9158 0.6153 0.061 Uiso 1 1 calc R . . 
C9 C 0.1019(5) 0.95650(18) 0.7671(4) 0.0469(10) Uani 1 1 d . . . 
C10 C 0.0887(6) 0.9473(2) 0.8974(5) 0.0645(14) Uani 1 1 d . . . 
H10A H 0.1229 0.9057 0.9191 0.097 Uiso 1 1 calc R . . 
H10B H -0.0281 0.9541 0.9143 0.097 Uiso 1 1 calc R . . 
H10C H 0.1631 0.9764 0.9408 0.097 Uiso 1 1 calc R . . 
C11 C 0.0377(6) 1.0216(2) 0.7300(6) 0.0732(16) Uani 1 1 d . . . 
H11A H 0.1068 1.0523 0.7730 0.110 Uiso 1 1 calc R . . 
H11B H -0.0804 1.0261 0.7459 0.110 Uiso 1 1 calc R . . 
H11C H 0.0465 1.0271 0.6478 0.110 Uiso 1 1 calc R . . 
N1 N 0.2830(4) 0.94925(14) 0.7380(3) 0.0380(8) Uani 1 1 d . . . 
C12 C 0.3335(5) 0.95337(19) 0.6292(4) 0.0444(10) Uani 1 1 d . . . 
O3 O 0.2425(4) 0.95763(17) 0.5371(3) 0.0643(9) Uani 1 1 d . . . 
C13 C 0.5278(5) 0.9531(2) 0.6418(4) 0.0515(11) Uani 1 1 d . . . 
H13A H 0.5718 0.9132 0.6188 0.062 Uiso 1 1 calc R . . 
H13B H 0.5728 0.9854 0.5942 0.062 Uiso 1 1 calc R . . 
O4 O 0.5737(3) 0.96444(14) 0.7628(3) 0.0479(8) Uani 1 1 d . . . 
C14 C 0.4336(4) 0.94479(17) 0.8243(3) 0.0388(9) Uani 1 1 d . . . 
H14 H 0.4203 0.9726 0.8904 0.047 Uiso 1 1 calc R . . 
C15 C 0.4666(5) 0.87856(19) 0.8672(4) 0.0474(10) Uani 1 1 d . . . 
H15A H 0.3654 0.8632 0.9011 0.057 Uiso 1 1 calc R . . 
H15B H 0.4861 0.8522 0.8013 0.057 Uiso 1 1 calc R . . 
C16 C 0.6209(5) 0.8746(2) 0.9575(4) 0.0457(10) Uani 1 1 d . . . 
O5 O 0.6782(4) 0.92071(16) 1.0082(3) 0.0625(9) Uani 1 1 d . . . 
C17 C 0.6955(5) 0.8132(2) 0.9815(4) 0.0489(11) Uani 1 1 d . . . 
C18 C 0.7438(10) 0.7057(3) 0.9872(6) 0.091(2) Uani 1 1 d . . . 
H18 H 0.7272 0.6635 0.9731 0.109 Uiso 1 1 calc R . . 
C19 C 0.6284(5) 0.75357(19) 0.9348(4) 0.0465(10) Uani 1 1 d . . . 
H19 H 0.5315 0.7475 0.8823 0.056 Uiso 1 1 calc R . . 
C20 C 0.8839(9) 0.7297(4) 1.0619(6) 0.106(3) Uani 1 1 d . . . 
H20 H 0.9692 0.7050 1.1004 0.127 Uiso 1 1 calc R . . 
S1 S 0.8790(2) 0.80681(10) 1.07300(17) 0.1034(7) Uani 1 1 d . . . 
 
loop_ 
 _atom_site_aniso_label 
 _atom_site_aniso_U_11 
 _atom_site_aniso_U_22 
 _atom_site_aniso_U_33 
 _atom_site_aniso_U_23 
 _atom_site_aniso_U_13 
 _atom_site_aniso_U_12 
C1 0.064(3) 0.037(2) 0.080(3) -0.002(2) 0.028(3) 0.000(2) 
C2 0.092(4) 0.077(4) 0.095(4) 0.014(3) 0.020(4) 0.018(4) 
C3 0.118(6) 0.056(4) 0.140(7) -0.003(4) 0.060(5) -0.003(4) 
C4 0.118(6) 0.061(4) 0.141(7) -0.023(4) 0.056(5) -0.026(4) 
C5 0.068(3) 0.051(3) 0.068(3) -0.014(2) 0.019(2) -0.012(2) 
C6 0.058(3) 0.044(2) 0.064(3) -0.011(2) 0.024(2) -0.010(2) 
C7 0.043(2) 0.047(2) 0.061(3) -0.008(2) 0.004(2) -0.0095(18) 
O1 0.065(2) 0.067(2) 0.122(3) 0.002(2) -0.037(2) -0.0207(18) 
O2 0.0354(14) 0.0375(15) 0.069(2) -0.0046(13) 0.0024(13) -0.0035(11) 
C8 0.0312(19) 0.044(2) 0.077(3) 0.001(2) -0.0010(19) 0.0001(17) 
C9 0.0286(18) 0.039(2) 0.073(3) -0.009(2) 0.0072(18) 0.0015(16) 
C10 0.047(2) 0.070(3) 0.080(3) -0.023(3) 0.026(2) -0.009(2) 
C11 0.043(2) 0.040(2) 0.136(5) -0.004(3) 0.006(3) 0.0098(19) 
N1 0.0267(15) 0.0394(17) 0.0479(19) 0.0030(14) 0.0037(13) 0.0011(12) 
C12 0.037(2) 0.044(2) 0.052(3) 0.0079(19) 0.0032(18) 0.0028(17) 
O3 0.0528(18) 0.085(2) 0.0527(19) 0.0172(17) -0.0061(15) -0.0010(17) 
C13 0.037(2) 0.066(3) 0.054(3) 0.013(2) 0.0129(18) 0.0045(19) 
O4 0.0301(13) 0.0571(18) 0.0560(18) 0.0086(14) 0.0020(12) -0.0035(12) 
C14 0.0304(18) 0.038(2) 0.048(2) 0.0014(17) 0.0031(16) -0.0021(15) 
C15 0.044(2) 0.041(2) 0.055(3) 0.0028(19) -0.0055(19) -0.0043(17) 
C16 0.044(2) 0.046(2) 0.048(2) 0.0085(19) 0.0047(18) -0.0027(18) 
O5 0.060(2) 0.059(2) 0.064(2) -0.0003(16) -0.0125(16) -0.0065(16) 
C17 0.042(2) 0.058(3) 0.048(2) 0.015(2) 0.0124(18) 0.0103(19) 
C18 0.116(5) 0.063(3) 0.103(5) 0.027(3) 0.060(5) 0.030(3) 
C19 0.050(2) 0.041(2) 0.052(2) 0.0171(19) 0.0187(19) 0.0158(18) 
C20 0.081(4) 0.145(7) 0.096(5) 0.071(5) 0.036(4) 0.066(5) 
S1 0.0871(12) 0.1263(17) 0.0958(13) 0.0303(11) 0.0036(10) 0.0203(10) 
 
_geom_special_details 
; 
 All esds (except the esd in the dihedral angle between two l.s. planes) 
 are estimated using the full covariance matrix.  The cell esds are taken 
 into account individually in the estimation of esds in distances, angles 
 and torsion angles; correlations between esds in cell parameters are only 
 used when they are defined by crystal symmetry.  An approximate (isotropic) 
 treatment of cell esds is used for estimating esds involving l.s. planes. 
; 
 
loop_ 
 _geom_bond_atom_site_label_1 
 _geom_bond_atom_site_label_2 
 _geom_bond_distance 
 _geom_bond_site_symmetry_2 
 _geom_bond_publ_flag 
C1 C2 1.383(8) . ? 
C1 C6 1.458(7) . ? 
C1 H1 0.9300 . ? 
C2 C3 1.318(10) . ? 
C2 H2 0.9300 . ? 
C3 C4 1.319(11) . ? 
C3 H3 0.9300 . ? 
C4 C5 1.314(9) . ? 
C4 H4 0.9300 . ? 
C5 C6 1.448(6) . ? 
C5 H5 0.9300 . ? 
C6 C7 1.474(6) . ? 
C7 O1 1.207(6) . ? 
C7 O2 1.328(5) . ? 
O2 C8 1.458(5) . ? 
C8 C9 1.514(6) . ? 
C8 H8A 0.9700 . ? 
C8 H8B 0.9700 . ? 
C9 N1 1.489(5) . ? 
C9 C10 1.523(7) . ? 
C9 C11 1.534(6) . ? 
C10 H10A 0.9600 . ? 
C10 H10B 0.9600 . ? 
C10 H10C 0.9600 . ? 
C11 H11A 0.9600 . ? 
C11 H11B 0.9600 . ? 
C11 H11C 0.9600 . ? 
N1 C12 1.350(5) . ? 
N1 C14 1.466(5) . ? 
C12 O3 1.220(5) . ? 
C12 C13 1.508(6) . ? 
C13 O4 1.423(5) . ? 
C13 H13A 0.9700 . ? 
C13 H13B 0.9700 . ? 
O4 C14 1.419(4) . ? 
C14 C15 1.522(5) . ? 
C14 H14 0.9800 . ? 
C15 C16 1.515(6) . ? 
C15 H15A 0.9700 . ? 
C15 H15B 0.9700 . ? 
C16 O5 1.213(5) . ? 
C16 C17 1.460(6) . ? 
C17 C19 1.467(6) . ? 
C17 S1 1.699(5) . ? 
C18 C20 1.421(11) . ? 
C18 C19 1.460(7) . ? 
C18 H18 0.9300 . ? 
C19 H19 0.9300 . ? 
C20 S1 1.665(9) . ? 
C20 H20 0.9300 . ? 
 
loop_ 
 _geom_angle_atom_site_label_1 
 _geom_angle_atom_site_label_2 
 _geom_angle_atom_site_label_3 
 _geom_angle 
 _geom_angle_site_symmetry_1 
 _geom_angle_site_symmetry_3 
 _geom_angle_publ_flag 
C2 C1 C6 115.8(5) . . ? 
C2 C1 H1 122.1 . . ? 
C6 C1 H1 122.1 . . ? 
C3 C2 C1 122.2(7) . . ? 
C3 C2 H2 118.9 . . ? 
C1 C2 H2 118.9 . . ? 
C2 C3 C4 123.5(7) . . ? 
C2 C3 H3 118.3 . . ? 
C4 C3 H3 118.3 . . ? 
C5 C4 C3 121.0(7) . . ? 
C5 C4 H4 119.5 . . ? 
C3 C4 H4 119.5 . . ? 
C4 C5 C6 120.2(6) . . ? 
C4 C5 H5 119.9 . . ? 
C6 C5 H5 119.9 . . ? 
C5 C6 C1 117.3(4) . . ? 
C5 C6 C7 120.2(5) . . ? 
C1 C6 C7 122.4(4) . . ? 
O1 C7 O2 122.5(4) . . ? 
O1 C7 C6 123.8(4) . . ? 
O2 C7 C6 113.7(4) . . ? 
C7 O2 C8 115.5(3) . . ? 
O2 C8 C9 109.4(3) . . ? 
O2 C8 H8A 109.8 . . ? 
C9 C8 H8A 109.8 . . ? 
O2 C8 H8B 109.8 . . ? 
C9 C8 H8B 109.8 . . ? 
H8A C8 H8B 108.2 . . ? 
N1 C9 C8 110.4(3) . . ? 
N1 C9 C10 111.1(3) . . ? 
C8 C9 C10 109.6(4) . . ? 
N1 C9 C11 108.9(3) . . ? 
C8 C9 C11 106.7(4) . . ? 
C10 C9 C11 109.9(4) . . ? 
C9 C10 H10A 109.5 . . ? 
C9 C10 H10B 109.5 . . ? 
H10A C10 H10B 109.5 . . ? 
C9 C10 H10C 109.5 . . ? 
H10A C10 H10C 109.5 . . ? 
H10B C10 H10C 109.5 . . ? 
C9 C11 H11A 109.5 . . ? 
C9 C11 H11B 109.5 . . ? 
H11A C11 H11B 109.5 . . ? 
C9 C11 H11C 109.5 . . ? 
H11A C11 H11C 109.5 . . ? 
H11B C11 H11C 109.5 . . ? 
C12 N1 C14 110.2(3) . . ? 
C12 N1 C9 124.5(3) . . ? 
C14 N1 C9 124.8(3) . . ? 
O3 C12 N1 127.7(4) . . ? 
O3 C12 C13 125.5(4) . . ? 
N1 C12 C13 106.8(3) . . ? 
O4 C13 C12 104.5(3) . . ? 
O4 C13 H13A 110.8 . . ? 
C12 C13 H13A 110.8 . . ? 
O4 C13 H13B 110.8 . . ? 
C12 C13 H13B 110.8 . . ? 
H13A C13 H13B 108.9 . . ? 
C14 O4 C13 107.5(3) . . ? 
O4 C14 N1 104.4(3) . . ? 
O4 C14 C15 109.0(3) . . ? 
N1 C14 C15 112.3(3) . . ? 
O4 C14 H14 110.3 . . ? 
N1 C14 H14 110.3 . . ? 
C15 C14 H14 110.3 . . ? 
C16 C15 C14 111.9(3) . . ? 
C16 C15 H15A 109.2 . . ? 
C14 C15 H15A 109.2 . . ? 
C16 C15 H15B 109.2 . . ? 
C14 C15 H15B 109.2 . . ? 
H15A C15 H15B 107.9 . . ? 
O5 C16 C17 121.8(4) . . ? 
O5 C16 C15 121.1(4) . . ? 
C17 C16 C15 117.1(4) . . ? 
C16 C17 C19 126.9(4) . . ? 
C16 C17 S1 119.1(4) . . ? 
C19 C17 S1 114.0(3) . . ? 
C20 C18 C19 113.7(6) . . ? 
C20 C18 H18 123.2 . . ? 
C19 C18 H18 123.2 . . ? 
C18 C19 C17 106.3(5) . . ? 
C18 C19 H19 126.8 . . ? 
C17 C19 H19 126.8 . . ? 
C18 C20 S1 112.7(4) . . ? 
C18 C20 H20 123.6 . . ? 
S1 C20 H20 123.6 . . ? 
C20 S1 C17 93.3(3) . . ? 
 
_diffrn_measured_fraction_theta_max    0.999 
_diffrn_reflns_theta_full              25.35 
_diffrn_measured_fraction_theta_full   0.999 
_refine_diff_density_max    0.623 
_refine_diff_density_min   -0.801 
_refine_diff_density_rms    0.093 
